# Supplementary material
Source: PubMed Central journal article supplement (PMC4013777)
Supplement: jcbfm20149x1.pdf [file jcbfm20149x1.pdf]

**Supplemental table 1: Primers and probes used for real-time polymerase chain reaction**

| Gene name                                       | Symbol        | Genebank No. | Function | Nucleotide sequence                     |
|-------------------------------------------------|---------------|--------------|----------|-----------------------------------------|
| Chemokine (C-C motif) ligand 2                  | <i>Ccl2</i>   | NM_011333    | Forward  | 5'-GAGCATCCACGTGTTGGCT-3'               |
|                                                 |               |              | Reverse  | 5'-TGGTGAATGAGTAGCAGCAGGT-3'            |
|                                                 |               |              | Probe    | 5'-AGCCAGATGCAGTTAACGCCCCACT-3'         |
| Chemokine (C-C motif) ligand 3                  | <i>Ccl3</i>   | NM_011337    | Forward  | 5'-CAGCCAGGTGTCATTTTCCT-3'              |
|                                                 |               |              | Reverse  | 5'-CCAAGACTCTCAGGCATTCAG-3'             |
|                                                 |               |              | Probe    | 5'-AGGAGAAACCGGCAGATCTGCGCT-3'          |
| Chemokine (C-X-C motif) ligand 1                | <i>Cxcl1</i>  | NM_008176    | Forward  | 5'-CATAGCCACACTCAAGAATGGT-3'            |
|                                                 |               |              | Reverse  | 5'-TGAACCAAGGGAGCTTCAG-3'               |
|                                                 |               |              | Probe    | 5'-CGCGAGGCTTGCCTTGACC-3'               |
| Chemokine (C-X3-C motif) ligand 1               | <i>Cx3cl1</i> | NM_009142    | Forward  | 5'-ATTGTCCTGGAGACGACACA-3'              |
|                                                 |               |              | Reverse  | 5'-GCTTCTCAAACCTGCCACCA-3'              |
|                                                 |               |              | Probe    | 5'-TCTGTGCTGACCCGAAGGAGAAATG-3'         |
| Hypoxanthine guanine phosphoribosyl transferase | <i>Hprt</i>   | NM_013556    | Forward  | 5'-AGCTTGCTGGTGAAAAGGAC-3'              |
|                                                 |               |              | Reverse  | 5'-AGTCAAGGGCATATCCAACAAC-3'            |
|                                                 |               |              | Probe    | 5'-AGTGTGGATACAGGCCAGACTTTGTTG-3'       |
| Intercellular adhesion molecule 1               | <i>Icam1</i>  | NM_010493    | Forward  | 5'-CCTAAGATGACCTGCAGACGG-3'             |
|                                                 |               |              | Reverse  | 5'-TTTGACAGACTTCACCACCCC-3'             |
|                                                 |               |              | Probe    | 5'-CAGATGGTGCCCTGCTGCCCA-3'             |
| Interleukin 1 beta                              | <i>Il1b</i>   | NM_008361    | Forward  | 5'-TTGTGCAAGTGTCTGAAGCA-3'              |
|                                                 |               |              | Reverse  | 5'-TCACTGTCAAAAAGGTGGCATT-3'            |
|                                                 |               |              | Probe    | 5'-CTATGGCAACTGTTCCCTGAACTCAACTGTG-3'   |
| Interleukin 6                                   | <i>Il6</i>    | NM_031168    | Forward  | 5'-GCAAGAGACTTCCATCCAGTT-3'             |
|                                                 |               |              | Reverse  | 5'-TCCTCTGTGAAGTCTCCTCTCC-3'            |
|                                                 |               |              | Probe    | 5'-CCTTCTTGGGACTGATGCTGGTGAC-3'         |
| Selectin, endothelial cell (E-selectin)         | <i>Sele</i>   | NM_011345    | Forward  | 5'-CAACAATTCCACTGAACAGAAAGT-3'          |
|                                                 |               |              | Reverse  | 5'-CTCCAGCGAGGAGAACAAAA-3'              |
|                                                 |               |              | Probe    | 5'-CAGTCTAGCGCTGGATGAAAGCAAC-3'         |
| Selectin, platelet (P-selectin)                 | <i>Selp</i>   | NM_011347    | Forward  | 5'-CAGAAAGAAAGATGATGGAAAATG-3'          |
|                                                 |               |              | Reverse  | 5'-CGGGTTTCTTAAGGGGTTG-3'               |
|                                                 |               |              | Probe    | 5'-TTGAACCCTCACAGCCACCTAGGAAC-3'        |
| Tumor necrosis factor                           | <i>Tnf</i>    | NM_013693    | Forward  | 5'-TCTATGGCCCAGACCCTCAC-3'              |
|                                                 |               |              | Reverse  | 5'-TTGCTACGACGTGGGCTACA-3'              |
|                                                 |               |              | Probe    | 5'-CTCAGATCATCTTCTCAAATTCGAGTGACAAGC-3' |
| Vascular cell adhesion molecule 1               | <i>Vcam1</i>  | NM_011693    | Forward  | 5'-TCTACATCTCTCCAGGAATACAAC-3'          |
|                                                 |               |              | Reverse  | 5'-GAACAGGTCATTGTCACAGCA-3'             |
|                                                 |               |              | Probe    | 5'-ATCTCTGTACATCCCTCCACAAGGCTTCA-3'     |

**Supplemental table 2: Regional cerebral blood flow during and after middle cerebral artery occlusion**

| Sacrifice | Treatment | N  | Weight (g) | Regional cerebral blood flow |       |          |
|-----------|-----------|----|------------|------------------------------|-------|----------|
|           |           |    |            | T0                           | T1    | W        |
| 6 h       | Saline    | 23 | 24.7 ± 3.2 | 7 ± 3                        | 8 ± 5 | 119 ± 30 |
|           | rtPA      | 23 | 25.4 ± 2.0 | 7 ± 2                        | 9 ± 4 | 119 ± 24 |
| 24 h      | Saline    | 20 | 24.7 ± 2.3 | 7 ± 3                        | 7 ± 2 | 114 ± 29 |
|           | rtPA      | 32 | 24.9 ± 2.2 | 8 ± 3                        | 9 ± 4 | 115 ± 35 |
| 72 h      | Saline    | 23 | 24.7 ± 3.0 | 8 ± 3                        | 7 ± 2 | 119 ± 24 |
|           | rtPA      | 34 | 25.1 ± 2.4 | 6 ± 2                        | 7 ± 3 | 116 ± 31 |

Regional cerebral blood flow is expressed as a percentage of pre-ischemic values. Measures were performed at the onset of ischemia (T0), just before reperfusion (T1), and immediately after suture withdrawal (W). Only animals meeting the inclusion criteria are shown.

**Supplemental table 3: Contralateral mRNA level changes during reperfusion**

| Gene         | Treatment | 6 h reperfusion | 24 h reperfusion | 72 h reperfusion      |
|--------------|-----------|-----------------|------------------|-----------------------|
| <i>Ccl2</i>  | Saline    | 1.0 [0.8-1.4]   | 3.5 [1.1-6.4] +  | 1.0 [0.8-2.6]         |
|              | rtPA      | 0.9 [0.7-1.2]   | 1.5 [1.1-2.2] +  | 1.2 [0.9-1.5]         |
| <i>Ccl3</i>  | Saline    | 1.0 [0.8-1.2]   | 1.7 [1.2-3.4] +  | 2.0 [1.5-4.7] +       |
|              | rtPA      | 1.0 [0.9-1.1]   | 1.1 [0.9-2.0]    | 2.2 [1.7-3.8] +, x    |
| <i>Cxcl1</i> | Saline    | 1.0 [0.8-2.0]   | 0.7 [0.4-1.2]    | 0.5 [0.3-2.2]         |
|              | rtPA      | 0.7 [0.3-1.3]   | 0.8 [0.5-0.9]    | 1.9 [0.8-4.4] +       |
| <i>Il1b</i>  | Saline    | 1.0 [0.9-1.4]   | 1.8 [1.6-2.3] +  | 1.1 [1.0-1.3]         |
|              | rtPA      | 1.2 [0.8-1.8]   | 1.5 [1.3-1.9]    | 2.0 [1.2-2.6]         |
| <i>Il6</i>   | Saline    | 1.0 [0.7-2.1]   | 0.5 [0.3-0.9]    | 0.7 [0.3-2.2]         |
|              | rtPA      | 0.5 [0.3-2.2]   | 0.7 [0.5-1.1]    | 2.8 [0.4-4.6]         |
| <i>Tnf</i>   | Saline    | 1.0 [0.5-2.0]   | 1.0 [0.7-1.2]    | 1.2 [0.9-1.5]         |
|              | rtPA      | 1.0 [0.5-1.3]   | 0.9 [0.7-1.2]    | 2.2 [1.8-4.0] +, x, † |

+, statistically different from the 6 h-time point level in the same treatment group;

x, statistically different from the 24 h-time point level in the same treatment group;

†, statistically different from the saline-treated group at the same time point.

Values are representative of 9 to 10 animals and are shown as relative fold increases compared to contralateral values in the saline-treated group reperfused for 6 h.

**Supplemental table 4: Contralateral protein level changes during reperfusion**

| <b>Protein</b> | <b>Treatment</b> | <b>6 h reperfusion</b> | <b>24 h reperfusion</b> | <b>72 h reperfusion</b> |
|----------------|------------------|------------------------|-------------------------|-------------------------|
| CCL2           | Saline           | 36.1 [27.0-43.4]       | 37.4 [33.6-41.3]        | 35.3 [25.7-49.0]        |
|                | rtPA             | 35.7 [27.1-42.2]       | 40.5 [29.4-53.9]        | 44.2 [24.7-55.7]        |
| CCL3           | Saline           | ND                     | ND                      | ND                      |
|                | rtPA             | ND                     | ND                      | ND                      |
| CXCL1          | Saline           | 4.8 [3.9-5.8]          | 3.8 [3.3-5.0]           | 3.3 [2.8-3.5] +         |
|                | rtPA             | 6.5 [4.4-9.3]          | 4.1 [3.6-5.6] +         | 3.9 [3.4-4.2] +         |
| IL-1b          | Saline           | 12.0 [5.2-14.2]        | 12.9 [6.1-18.6]         | 8.7 [6.7-10.7]          |
|                | rtPA             | 12.5 [9.4-18.3]        | 11.7 [6.3-12.9]         | 14.4 [11.5-22.1]        |
| IL-6           | Saline           | 3.7 [3.1-3.9]          | 4.0 [3.5-4.2]           | 3.5 [3.2-3.7]           |
|                | rtPA             | 3.8 [3.6-4.4]          | 4.3 [3.5-4.8]           | 4.3 [4.0-4.4] †         |
| TNFa           | Saline           | 268.4 [250.3-318.7]    | 210.7 [203.7-237.1]     | 237.8 [188-294.2]       |
|                | rtPA             | 260.0 [236.7-347.5]    | 233.5 [180.9-331.7]     | 261.4 [184.6-316.3]     |

+, statistically different from the 6 h-time point level in the same treatment group;

†, statistically different from the saline-treated group at the same time point.

Values are representative of 9 to 10 animals and are expressed in pg/mg of protein. ND: non detectable.
